# Supplementary material for: PARP1 Deficiency Reduces Tumour Growth by Decreasing E2F1 Hyperactivation: A Novel Mechanism in the Treatment of Cancer
Source: PubMed Central journal article supplement (PMC7599842; doi:10.3390/cancers12102907), 2020-10-10
Supplement: cancers-12-02907-s001.pdf [file cancers-12-02907-s001.pdf]

Supplementary Materials

# PARP1 Deficiency Reduces Tumour Growth by Decreasing E2F1 Hyperactivation: A Novel Mechanism in the Treatment of Cancer

Pablo Iglesias, Marcos Seoane, Irene Golán, Isabel Castro-Piedras, Máximo Fraga, Víctor M. Arce and Jose A. Costoya

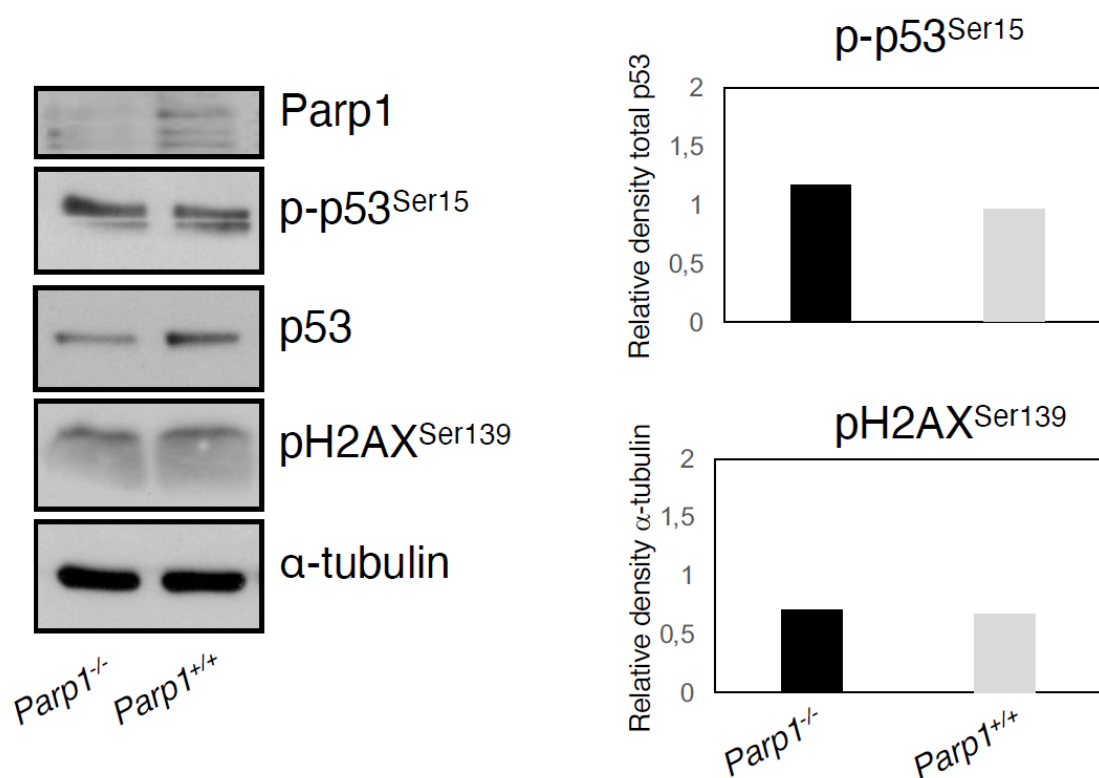

**Figure S1.** Immunoblot analysis of protein expression of DDR proteins in *Parp1*<sup>+/+</sup> and *Parp1*<sup>-/-</sup> cells. Densitometric analysis of protein bands performed with ImageJ.

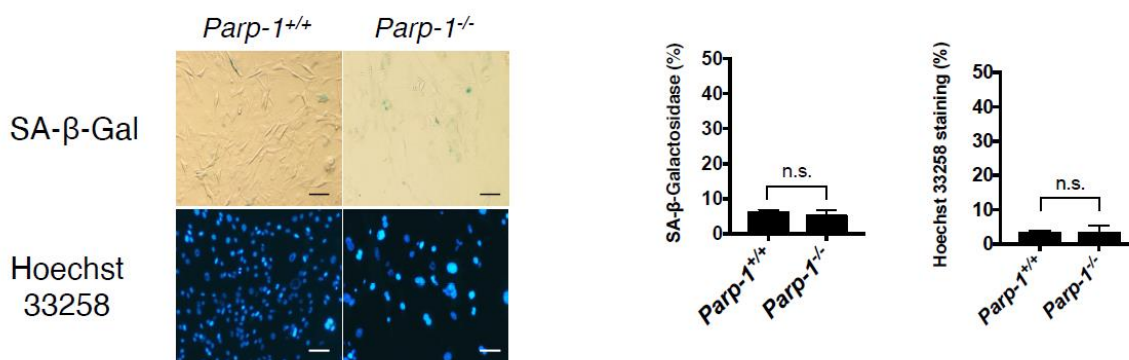

**Figure S2.** The absence of PARP1 has no effect on senescence and apoptosis. Scale (40×) = 25 μm.

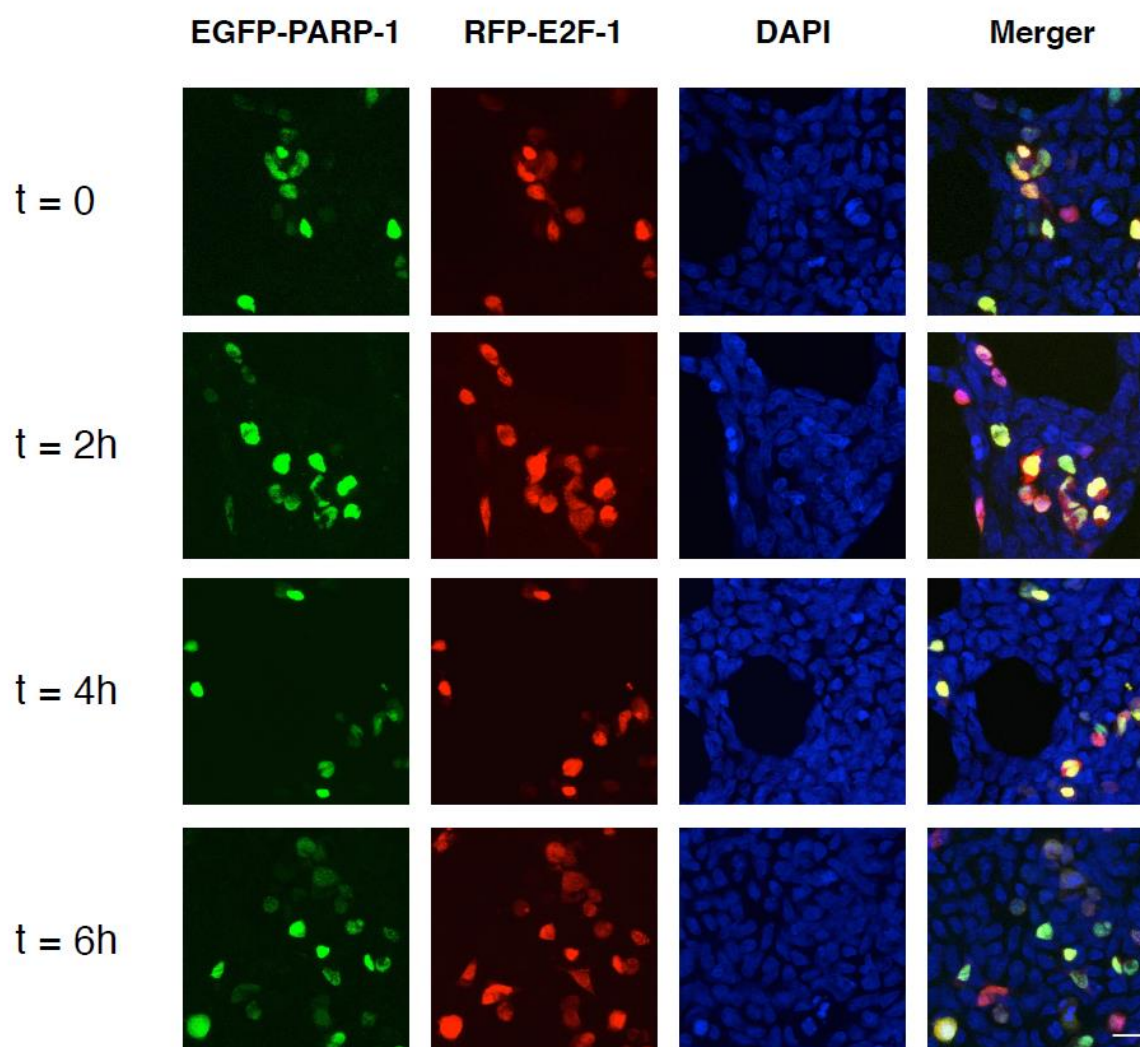

**Figure S3.** Laser scanning confocal microphotographs of colocalization of both proteins at different times after block release by double thymidine treatment. Scale (40 $\times$ ) = 25  $\mu$ m.

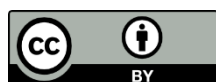

© 2020 by the authors. Licensee MDPI, Basel, Switzerland. This article is an open access article distributed under the terms and conditions of the Creative Commons Attribution (CC BY) license (<http://creativecommons.org/licenses/by/4.0/>).
